# Supplementary material for: (–)-Epicatechin Improves Vasoreactivity and Mitochondrial Respiration in Thermoneutral-Housed Wistar Rat Vasculature
Source: MDPI journal article supplement (doi:10.3390/nu14051097), 2022-03-05

**Supplementary Figure S1A:** Blots 1 and 2, total protein image for peNOS, eNOS, and SIRT1.

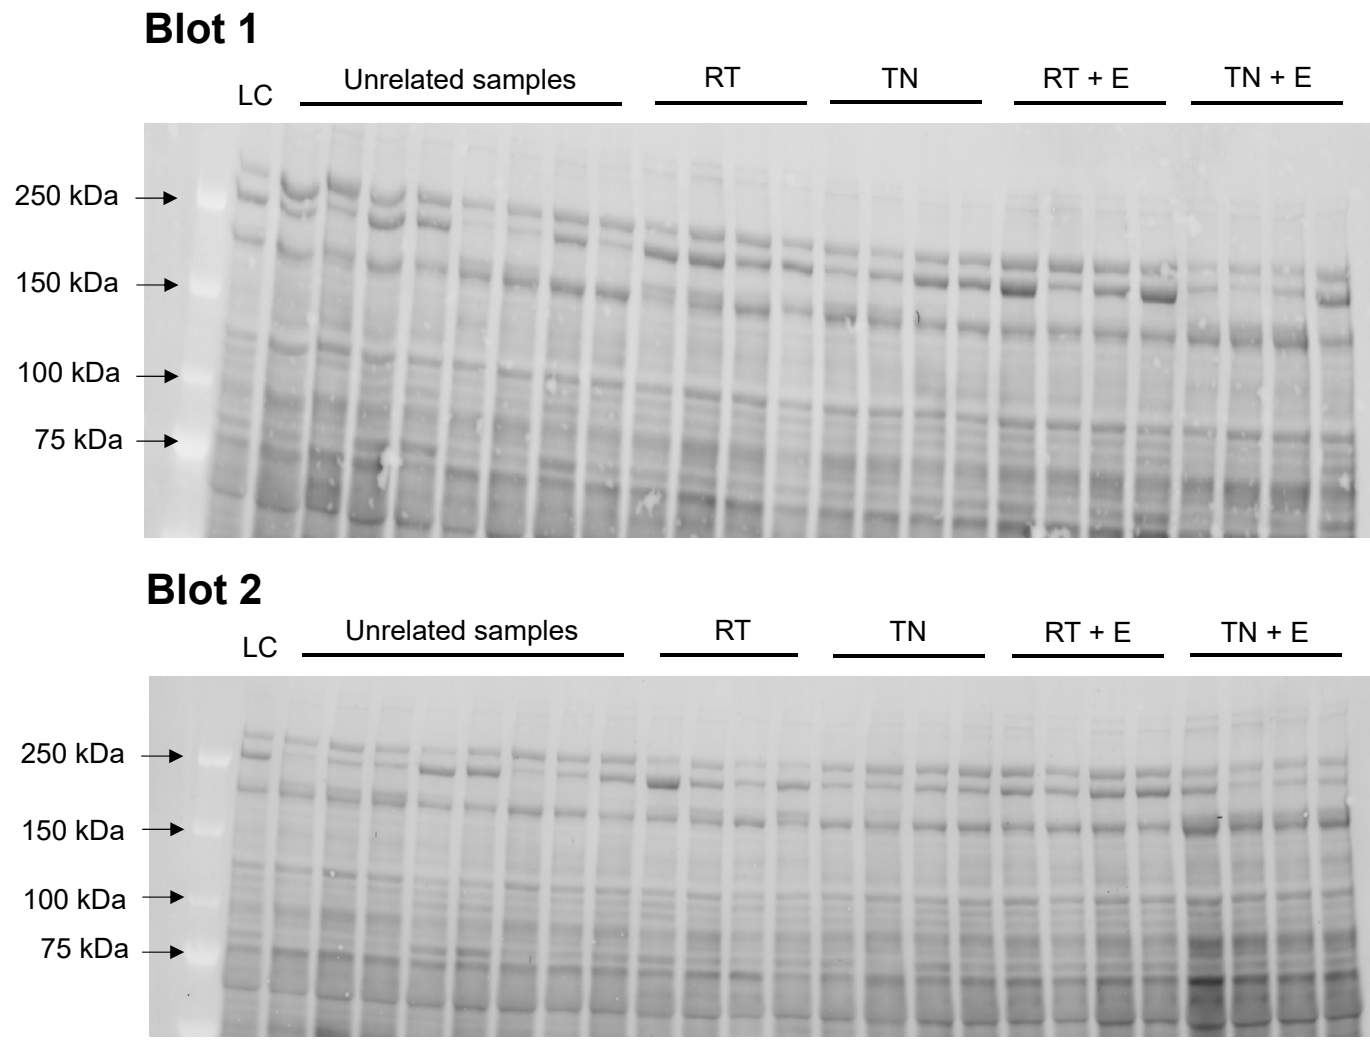

**Supplementary Figure S1B:** Blots 3 and 4, total protein image for pAMPK, AMPK, MnSOD, PGC1- $\alpha$  and mitochondrial complexes.

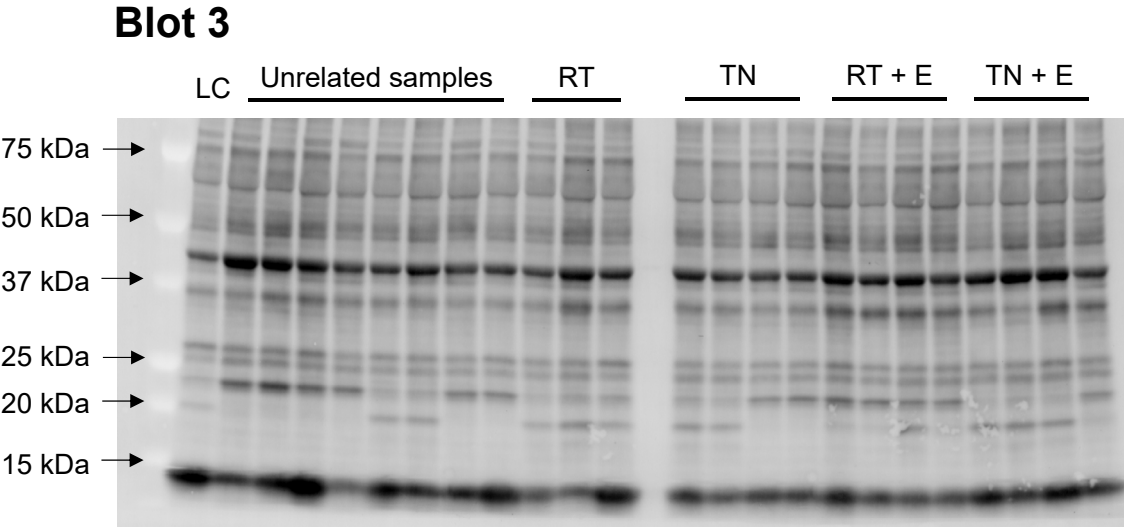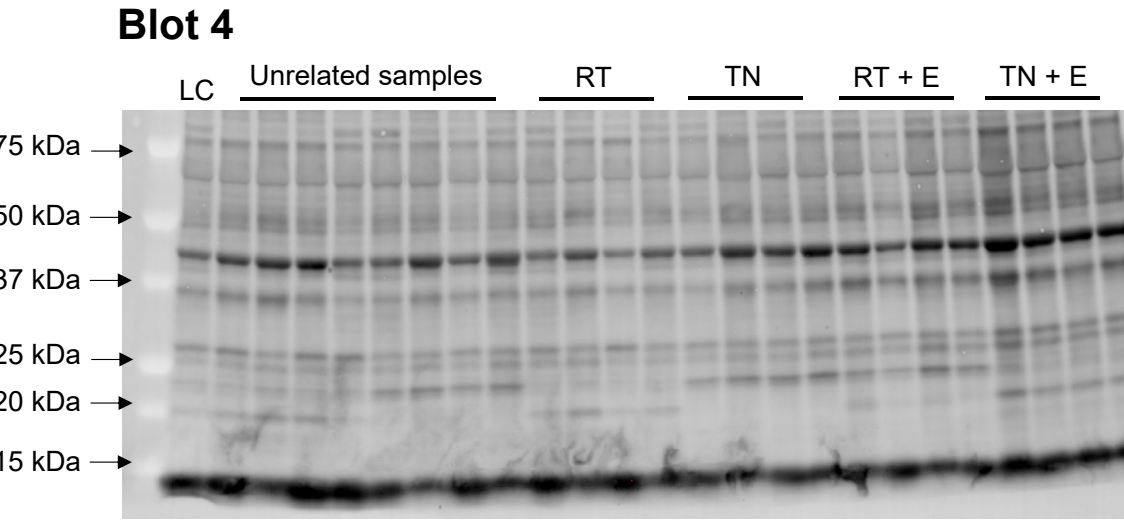

**Supplementary Figure S1C:** Blots 5 and 6, total protein image for SIRT3, pCaMKII, CaMKII, catalase, and SOD.

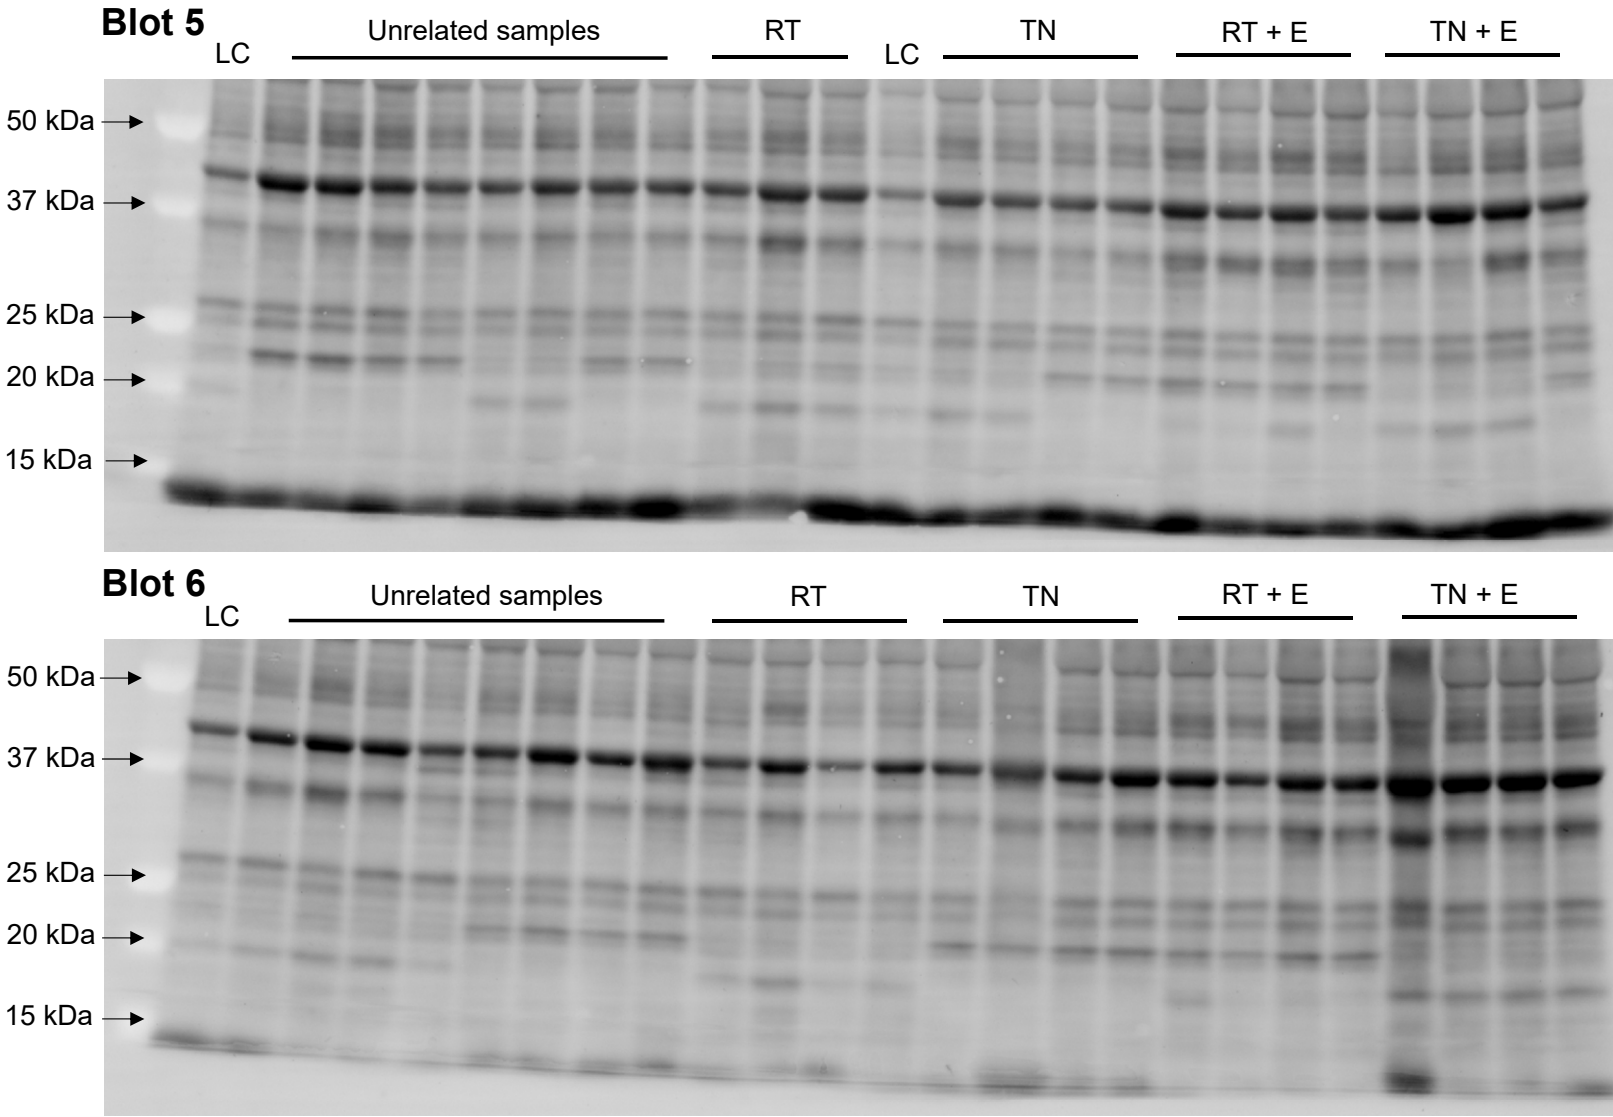

**Supplementary Figure S1D:** Non-denatured blots 1 and 2, total protein image for monomer/dimer eNOS.

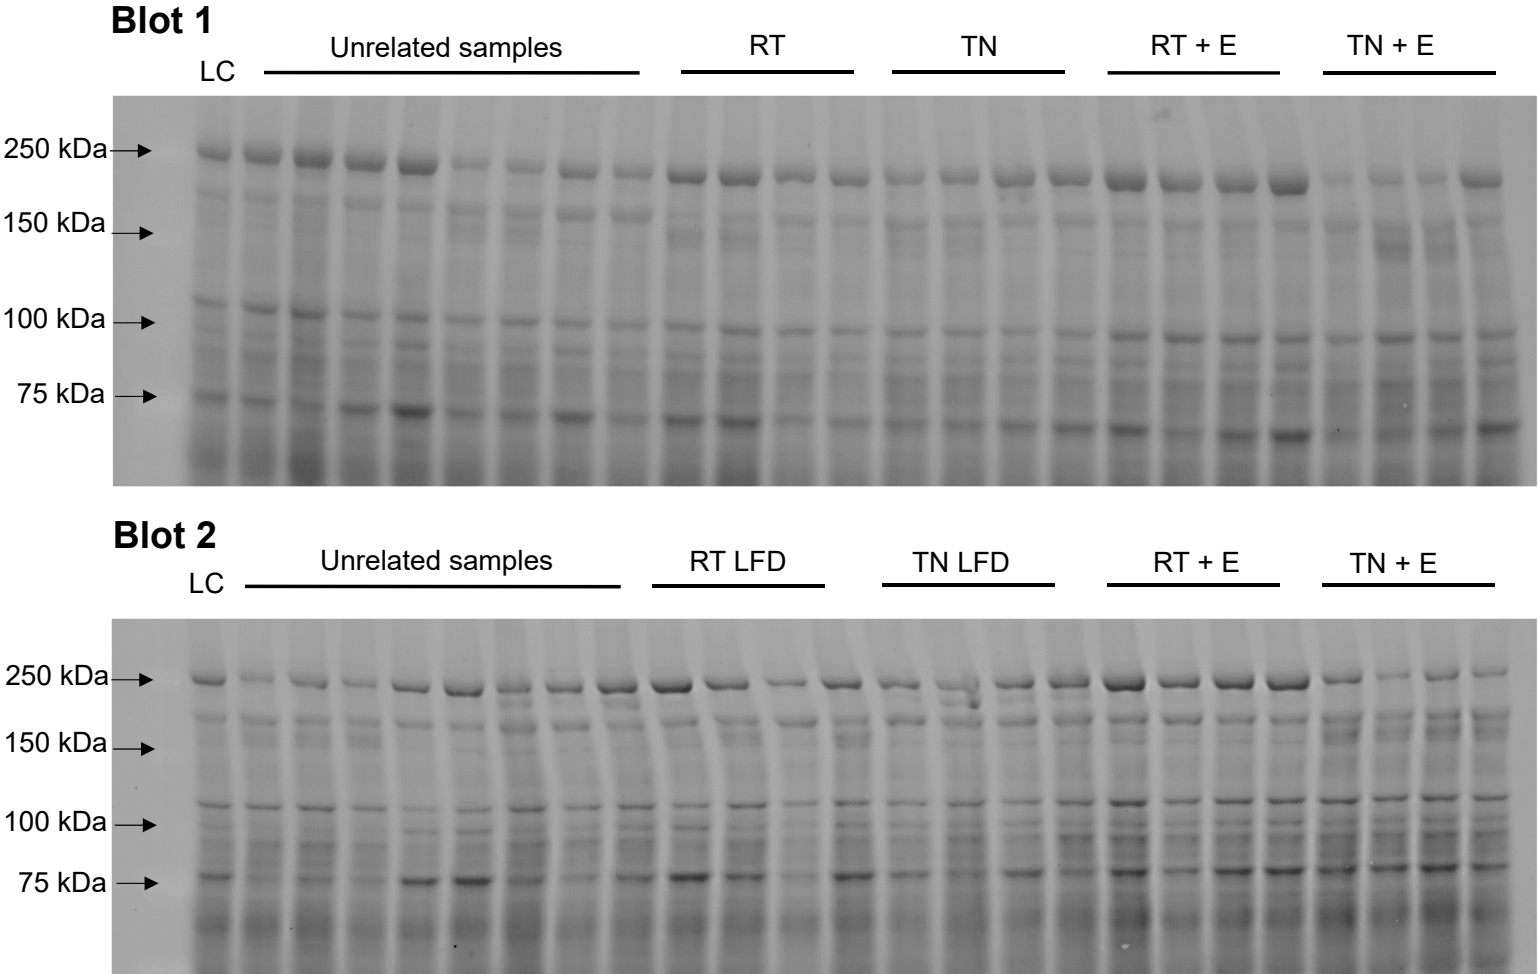

Supplement: s1 [file s1]
